# Supplementary material for: The role of rituximab in the management of patients with acquired thrombotic thrombocytopenic purpura
Source: Oxford University Press journal article supplement (doi:10.1182/blood-2014-10-559211), 2015-01-09
Supplement: blood-2014-10-559211-1.pdf [file blood-2014-10-559211-1.pdf]

## Evidence Tables

**Table 1: Rituximab used as initial treatment for acute episode of TTP**

| Author, year (ref)        | Study design/ comparison group                                                                                                                                                                                                                                                                                                               | Patients                                                                                                                                                                                                                                                                                                                                                                                                                                | TTP diagnosis/ inclusion-exclusion criteria                                                                                                                           | Rituximab dose, schedule                                                                                                                                                                                                                                               | Additional treatments                                                                                                                                                                                                                                                                                                                                                                                                                                                                          | Follow-up                                                                                                                                                                 | Outcomes                                                                                                                                                                                                                                                                                                                                                                                                                                                                                                                                                                                                                                                                                                                                                                                                                                                                                       | Comments                                                                                                                                                                                                                                               |
|---------------------------|----------------------------------------------------------------------------------------------------------------------------------------------------------------------------------------------------------------------------------------------------------------------------------------------------------------------------------------------|-----------------------------------------------------------------------------------------------------------------------------------------------------------------------------------------------------------------------------------------------------------------------------------------------------------------------------------------------------------------------------------------------------------------------------------------|-----------------------------------------------------------------------------------------------------------------------------------------------------------------------|------------------------------------------------------------------------------------------------------------------------------------------------------------------------------------------------------------------------------------------------------------------------|------------------------------------------------------------------------------------------------------------------------------------------------------------------------------------------------------------------------------------------------------------------------------------------------------------------------------------------------------------------------------------------------------------------------------------------------------------------------------------------------|---------------------------------------------------------------------------------------------------------------------------------------------------------------------------|------------------------------------------------------------------------------------------------------------------------------------------------------------------------------------------------------------------------------------------------------------------------------------------------------------------------------------------------------------------------------------------------------------------------------------------------------------------------------------------------------------------------------------------------------------------------------------------------------------------------------------------------------------------------------------------------------------------------------------------------------------------------------------------------------------------------------------------------------------------------------------------------|--------------------------------------------------------------------------------------------------------------------------------------------------------------------------------------------------------------------------------------------------------|
| Scully, 2011 <sup>1</sup> | Prospective, multicenter, phase 2 study between 2006-09 with follow-up at least 12 months<br>-Compared to historical controls (n=40) who did not receive rituximab<br>-Historical controls matched as far as possible for sex, ethnicity, number of relapses selected from the South East England TTP Registry based on completeness of data | 40; 34 first episode, 6 relapsed acute TTP<br>-Excluded pregnant or breastfeeding, HIV, childhood TTP, HUS, transplant, cancer<br>-86 patients screened, excluded 46 (7 deaths within 24 hours of diagnosis, 14 secondary TTP, 13 received rituximab off-trial (9 received initial rituximab >3 days after admission, 4 <18 years), 10 did not have TTP, 2 declined)<br><br>-Compared to 40 controls (31 first episode TTP, 9 relapsed) | Not based on ADAMTS13 levels, but measured on admission<br>-Median ADAMTS13 level at presentation <5% in rituximab and control groups but range of activity up to 40% | 375 mg/m <sup>2</sup> weekly x 4, started within 3 days of admission and diagnosis<br>-Additional rituximab x 4 given in patients with ADAMTS13 <55% or with persistently detectable inhibitors (4 patients received rituximab x 6, 2 patients received rituximab x 8) | PEX daily (intubated and ventilated patients received twice daily PEX), 38/40 (95%) patients received steroids (methylprednisol one 1 g daily x 3 days) and 4 patients received vincristine<br>-Controls treated as per the British Committee for Standards in Haematology guidelines (Methylprednisol one 1 g daily x 3 days followed by prednisone 1 mg/kg/d or only prednisone); 35/40 (87.5%) received steroids on admission<br>- 15 patients received: cyclosporine (7), defibrotide (5), | No median follow-up reported, rituximab patients followed at least 12 months, from Figure 4 follow-up longer in controls but time of censoring not shown for either group | <u>In rituximab group:</u><br>-3/40 deaths (7.5%)<br>-4/37 relapses (11%), median time to relapse 27 months (range 17-31 months) with ADAMTS13 levels <5% at relapse in 3 patients; 1 patient persistent <5% post-rituximab, 1 patient died in relapse<br>-Decrease in CD19 to 0.5% (0-2.78%) before 4 <sup>th</sup> rituximab treatment with normalization in 75% of patients within 12 months<br>-ADAMTS13 levels increase post-rituximab<br><br><u>In control group:</u><br>-2/40 deaths (5%)<br>-21/38 relapses (55%), median time to relapse 18 months (range 3-60 months), 1 patient died in relapse<br><br><u>Rituximab vs. control</u><br><u>-Relapse percentage 10% in rituximab vs. 57% in control</u><br>-Reduction in inpatient stay by 7 days in rituximab-treated patients compared to controls when 15 patients in the rituximab group who required ICU admission were excluded | - 6/40 (15%) rituximab patients intubated/ ventilated and received bid PEX; number of bid PEX in control group not reported<br>-No increase in infections or adverse outcomes documented with rituximab (however no statistical test or control group) |

|                             |                                                                                                                                                                     |                                                                                                                                                                                                                         |                                                                                                                                                                                         |                                                                                                                                                                                                                                                                                                                                                               |                                                                                                                                                                       |                                                                                                                                   |                                                                                                                                                                                                                                                                                                                                                                                                                                                                                                                                                                                                          |                                                                                                                                                                                                                                                                                                                                                                                                                                                                            |
|-----------------------------|---------------------------------------------------------------------------------------------------------------------------------------------------------------------|-------------------------------------------------------------------------------------------------------------------------------------------------------------------------------------------------------------------------|-----------------------------------------------------------------------------------------------------------------------------------------------------------------------------------------|---------------------------------------------------------------------------------------------------------------------------------------------------------------------------------------------------------------------------------------------------------------------------------------------------------------------------------------------------------------|-----------------------------------------------------------------------------------------------------------------------------------------------------------------------|-----------------------------------------------------------------------------------------------------------------------------------|----------------------------------------------------------------------------------------------------------------------------------------------------------------------------------------------------------------------------------------------------------------------------------------------------------------------------------------------------------------------------------------------------------------------------------------------------------------------------------------------------------------------------------------------------------------------------------------------------------|----------------------------------------------------------------------------------------------------------------------------------------------------------------------------------------------------------------------------------------------------------------------------------------------------------------------------------------------------------------------------------------------------------------------------------------------------------------------------|
|                             |                                                                                                                                                                     |                                                                                                                                                                                                                         |                                                                                                                                                                                         |                                                                                                                                                                                                                                                                                                                                                               | cyclophosphamide (3), splenectomy (1), vincristine (9)                                                                                                                |                                                                                                                                   | -No significant decrease in median PEX treatments to remission: 16.5 (range 4-34) vs 18 (6-92); p=0.5<br>-No difference in median number of days admitted: 16.5 (range 5-49) vs 20 (5-62)<br>-No difference in mortality at 3 months                                                                                                                                                                                                                                                                                                                                                                     |                                                                                                                                                                                                                                                                                                                                                                                                                                                                            |
| Westwood, 2013 <sup>2</sup> | Retrospective cohort, Jan 2004-Dec 2011<br>-No separate comparison group but evaluated early ( $\leq 3$ days) vs. later ( $> 3$ days) initial infusion of rituximab | 86; 54 received initial rituximab $\leq 3$ days from admission (31 previously reported by Scully, 2011) (38 first episode, 16 relapsed), 32 received rituximab $> 3$ days from admission (27 first episode, 5 relapsed) | Not based on ADAMTS13 levels, but measured on admission and during follow-up<br>-Median ADAMTS13 activity $< 5\%$ in both groups but range of activity to 30% (earlier) and 40% (later) | 375 mg/m <sup>2</sup> x 4 (maximum 8), given weekly pre-2009 (earlier n=31, later n=20); given every 3-4 days post 2009 (earlier n=21, later n=10)<br>- 2 patients in each group that died did not receive rituximab<br>-Additional 4 doses given if ADAMTS13 activity below normal range or continued presence of inhibitor or clinical deterioration (n=14) | PEX 1-2x/d based on clinical severity (intubated, neurologic or cardiac involvement given PEX bid), methylprednisolone 1 g/d x 3 days; other treatments not mentioned | -Median follow-up 45 months (4-100 months)<br>-Followed weekly x 4 weeks post discharge then monthly x 3 months, then q3-6 months | - Complete remission in 82/86 (95%) patients within 14 days (4-52 days)<br>- 4/86 deaths; 2 earlier, 2 later<br>-Among 82 survivors, earlier rituximab administration ( $\leq 3$ days, n=52) associated with faster time to remission (12 vs. 20 days, P < 0.001), fewer PEX (16 vs. 24, P = 0.03), shorter hospital stay (16 vs. 23 days, P = 0.01) compared to later rituximab administration (n=30)<br>- No difference in median time to relapse between earlier vs. later rituximab treatment (p=0.77); 11/82 (13.4%) relapsed at median 24 months (4-49 months)<br>- 2 deaths in previously treated | -No criteria reported for the decision to initial rituximab at $\geq 3$ or $> 3$ days from admission (although 31/52 survivors treated early due to Scully 2011 trial)<br>-TTP diagnosis based on thrombocytopenia, MAHA, normal clotting screen, LDH 1-1.5 x ULN<br>-No increase in infections (no data to support statement)<br>-Over 50% of patients had neurologic or cardiac involvement and 1/3 required ICU admission; most patients in this study received bid PEX |
| Pequeno-                    | Case series,                                                                                                                                                        | 3 patients, 1                                                                                                                                                                                                           | 1 patient had                                                                                                                                                                           | 100 mg IV                                                                                                                                                                                                                                                                                                                                                     | PEX 2x plasma                                                                                                                                                         | 3 patients                                                                                                                        | - All patients reached                                                                                                                                                                                                                                                                                                                                                                                                                                                                                                                                                                                   | -1 patient                                                                                                                                                                                                                                                                                                                                                                                                                                                                 |

|                            |                                                                    |                  |                                                                                            |                                                          |                                                                          |                                             |                                                                                    |                                                                        |
|----------------------------|--------------------------------------------------------------------|------------------|--------------------------------------------------------------------------------------------|----------------------------------------------------------|--------------------------------------------------------------------------|---------------------------------------------|------------------------------------------------------------------------------------|------------------------------------------------------------------------|
| Leuvano, 2013 <sup>3</sup> | single center, January 2011-September 2012<br>-No comparison group | patient with HIV | ADAMTS13 measurement at diagnosis (<5% activity), 1 other patient anti-ADAMTS13 antibodies | weekly x 4, initial infusion 2-8 days after start of PEX | volume (held x 24 hours post rituximab), prednisone 1 mg/kg day x 1 week | followed 9, 12 and 18 months from treatment | remission 5-21 days after rituximab<br>- No relapses with follow-up of 9-18 months | excluded, from this analysis who received rituximab for refractory TTP |
|----------------------------|--------------------------------------------------------------------|------------------|--------------------------------------------------------------------------------------------|----------------------------------------------------------|--------------------------------------------------------------------------|---------------------------------------------|------------------------------------------------------------------------------------|------------------------------------------------------------------------|

**Table 2: Rituximab used for treatment of refractory TTP**

| Author, year (ref)           | Study design/ comparison group                                                                                                                                                                                                                                                                                                                            | Patients                                                                                                                                                                                                                                                                                                                                                                                                                                                                | TTP diagnosis/ inclusion-exclusion criteria                                                                                                                                                   | Rituximab dose, schedule                                                                                                                                                                              | Additional treatments                                                                                                                                                                                                                                                                                                    | Follow-up (months)                                                                     | Outcomes                                                                                                                                                                                                                                                                                                                                                                                                                                                                                                                                                                                                                                                                                                                                                                                                                                                                                                                                                                                | Comments                                                                                                                                                                                                                                                                                                                                                                                                                                                                                                                                                              |
|------------------------------|-----------------------------------------------------------------------------------------------------------------------------------------------------------------------------------------------------------------------------------------------------------------------------------------------------------------------------------------------------------|-------------------------------------------------------------------------------------------------------------------------------------------------------------------------------------------------------------------------------------------------------------------------------------------------------------------------------------------------------------------------------------------------------------------------------------------------------------------------|-----------------------------------------------------------------------------------------------------------------------------------------------------------------------------------------------|-------------------------------------------------------------------------------------------------------------------------------------------------------------------------------------------------------|--------------------------------------------------------------------------------------------------------------------------------------------------------------------------------------------------------------------------------------------------------------------------------------------------------------------------|----------------------------------------------------------------------------------------|-----------------------------------------------------------------------------------------------------------------------------------------------------------------------------------------------------------------------------------------------------------------------------------------------------------------------------------------------------------------------------------------------------------------------------------------------------------------------------------------------------------------------------------------------------------------------------------------------------------------------------------------------------------------------------------------------------------------------------------------------------------------------------------------------------------------------------------------------------------------------------------------------------------------------------------------------------------------------------------------|-----------------------------------------------------------------------------------------------------------------------------------------------------------------------------------------------------------------------------------------------------------------------------------------------------------------------------------------------------------------------------------------------------------------------------------------------------------------------------------------------------------------------------------------------------------------------|
| Froissart, 2012 <sup>4</sup> | -Open label prospective, multicenter study<br>-21 consecutive patients between 2005-08 managed on standard protocol with rituximab<br>-Outcomes in rituximab-treated patients compared to 53 historical patients, treated between 2000-05 with same criteria for TTP (ADAMTS13 <10%) and suboptimal response to PEX, +/- vincristine +/- cyclophosphamide | -21 surviving adults with refractory TTP (platelets < double initial value after 4 days PEX and increased LDH) or a disease exacerbation (worsening neurologic symptoms and/or recurrent thrombocytopenia <100 x 2 days or worsening thrombocytopenia when treated with PEX)<br>-Rituximab treated patients: 6 refractory, 16 exacerbation; 3 had previous TTP (never previously treated with rituximab)<br>-53 surviving controls: 8 refractory, 47 had ≥ exacerbation | -ADAMTS13 <10%<br>-Excluded patients who received rituximab for previous TTP episode.<br>- 4 control subjects who met inclusion criteria but who died with their acute episode were excluded. | 375 mg/m <sup>2</sup> on day 1 of refractory determination (median 8.4±3.3 days after beginning PEX) and days 3, 7, 14.<br>-1 refractory TTP patient received rituximab x 2, vincristine x 2 but died | -PEX 1.5x plasma volume x 1 then 1x plasma volume until remission, steroids 1 mg/kg/d x 3 weeks (in patients with no active infection), folic acid.<br>-Steroid use: rituximab 15/21 (71%)<br>Controls 42/53 (79%)<br>-Other immune-suppressants at discretion of physician (vincristine, cyclophosphamide, splenectomy) | Mean 33±17.4 months (rituximab group) 2 lost to follow up, 35.3±28.5 months (controls) | -In patients treated with rituximab, time to durable remission shortened (p = .03); platelet count recovery within 35 days in the 21 survivors treated with rituximab, compared to 78% of historical controls (p < .02)<br>-No difference in plasma volume required to achieve durable remission between groups<br>-Mean time from rituximab to durable remission 12±6.7 days<br>-Non-significant decreased relapse at 1 year in rituximab-treated patients, none with relapse within first year compared with 5 (9.4%) controls (p=0.34); 3 rituximab patients (15.8%) relapsed >1 year (20 months, 2 & 3 years); no difference in long-term relapse (>1 year) p=0.68<br>- 1 death in rituximab group (after 2 rituximab infusions)<br>-ADAMTS13 levels higher in rituximab vs. controls after 1,3,6,9 months but not significant at 12 months; inhibitor titers similarly lower at 3,6,9 months compared to controls<br>-B cell depletion x 9 months, not significant after 12 months | -57 historical cohort patients identified based on same criteria for TTP and suboptimal response to PEX; 3 excluded with creatinine ≥2.25 mg/dl; 4 died and excluded; among survivors, 3 vincristine + cyclophosphamide, 17 vincristine; 42/53 (79%) received steroids; 8 refractory, 47 exacerbation<br>-ADAMTS13 activity and inhibitors measured at diagnosis, before treatment, and after 1, 3, 6, 9 and 12 months (drawn pre-PEX in patients receiving PEX)<br>-B-cell count evaluated before each rituximab infusion (x) and x+21 days, then 1, 3, 6, 9, and 12 |

|                             |                                                                          |                                                                                                                                                                                                                                         |                                                                                                          |                                                                                                                                                                                                                             |                                                                                                                                   |                                        |                                                                                                                                                                                                                                                                                                                   |                                                                                                                                                                                                                                                    |
|-----------------------------|--------------------------------------------------------------------------|-----------------------------------------------------------------------------------------------------------------------------------------------------------------------------------------------------------------------------------------|----------------------------------------------------------------------------------------------------------|-----------------------------------------------------------------------------------------------------------------------------------------------------------------------------------------------------------------------------|-----------------------------------------------------------------------------------------------------------------------------------|----------------------------------------|-------------------------------------------------------------------------------------------------------------------------------------------------------------------------------------------------------------------------------------------------------------------------------------------------------------------|----------------------------------------------------------------------------------------------------------------------------------------------------------------------------------------------------------------------------------------------------|
|                             |                                                                          |                                                                                                                                                                                                                                         |                                                                                                          |                                                                                                                                                                                                                             |                                                                                                                                   |                                        |                                                                                                                                                                                                                                                                                                                   | months later<br>-Safety assessed with standard case report form                                                                                                                                                                                    |
| Goyal, 2013 <sup>5</sup>    | Retrospective, single center, cases between 2003-08 -No comparison group | 12 included patients with first or relapsed episode who were refractory to PEX, treated with rituximab and who achieved remission                                                                                                       | ADAMTS13 levels <5% due to inhibitor                                                                     | 375 mg/m <sup>2</sup> weekly x median 4 doses (range 1-6)<br>-Started median 14 days post PEX initiation, range 5-28 days<br>-Rituximab initiated at discretion of physician if deemed for refractory course                | Daily PEX 1-1.5x plasma volume; 11 patients also received steroids and/or vincristine/ cyclophosphamide                           | Mean 73.4±6 months                     | -4/12 (33%) patients relapsed at mean 62±8.5 months post remission<br>-1, 3 and 5 year relapse free survival rates: 92%, 75%, 75%                                                                                                                                                                                 | -Included only patients with ADAMTS13<5% who received PEX and rituximab<br>- Among selected articles, the longest follow-up and also the highest relapse rate                                                                                      |
| Chemnitz, 2010 <sup>6</sup> | Retrospective, single center, cases between 2000-08 -No comparison group | 12 with first (5) or relapsed (5) episode who were, refractory to PEX (persistent TP or elevated LDH after PEX x 1 week) or who were allergic to plasma (2) 2/12 allergy to plasma.<br>-Excluded patients with secondary TTP (BMT, CTD, | -Not based on ADAMTS13 activity, clinical assessment<br>-2 patients had ADAMTS13 levels >75% at baseline | 375 mg/m <sup>2</sup> weekly x 4<br>-Rituximab initiated at discretion of physician if patient deemed refractory or be allergic to plasma<br>-2 patients received continuous rituximab therapy; 375 mg/m <sup>2</sup> every | PEX daily 1.5x plasma volume with FFP (held x 24 hours post rituximab) + steroids<br>-4/12 patients also treated with vincristine | Median 49.6 months, range 11-97 months | -All patients achieved CR post rituximab treatment<br>-3/12 relapsed (25%) after mean 50 months follow-up; all responded to repeated rituximab (follow up post 2 <sup>nd</sup> rituximab for these patients not reported)<br>-3/12 patients had ADAMTS13 levels <50% post-rituximab treatment at end of follow-up | -ADAMTS13 levels and inhibitors not measured on all patients at baseline (5 patients <10%; 2 patients 76% and 90%; 5 patients, ADAMTS13 activity not measured)<br>-ADAMTS13 activity and inhibitors measured at end of follow up<br>-No infectious |

|                                |                                                                                                                                                                                                      |                                                                                                                                      |                                                                                       |                                                                                                                                                                                                                                                   |                                                                                                                                                 |                                                                                    |                                                                                                                                                                                                                                                                                                                                                                                                                                                                                                                                                |                                                                                                                                                                                                                                                                                              |
|--------------------------------|------------------------------------------------------------------------------------------------------------------------------------------------------------------------------------------------------|--------------------------------------------------------------------------------------------------------------------------------------|---------------------------------------------------------------------------------------|---------------------------------------------------------------------------------------------------------------------------------------------------------------------------------------------------------------------------------------------------|-------------------------------------------------------------------------------------------------------------------------------------------------|------------------------------------------------------------------------------------|------------------------------------------------------------------------------------------------------------------------------------------------------------------------------------------------------------------------------------------------------------------------------------------------------------------------------------------------------------------------------------------------------------------------------------------------------------------------------------------------------------------------------------------------|----------------------------------------------------------------------------------------------------------------------------------------------------------------------------------------------------------------------------------------------------------------------------------------------|
|                                |                                                                                                                                                                                                      | active cancer)                                                                                                                       |                                                                                       | 4 weeks; 1 for 3 months, 1 continuous                                                                                                                                                                                                             |                                                                                                                                                 |                                                                                    |                                                                                                                                                                                                                                                                                                                                                                                                                                                                                                                                                | complications reported but unclear reporting/ collection of adverse events                                                                                                                                                                                                                   |
| de la Rubia, 2010 <sup>7</sup> | Retrospective, multicenter between 2003-08<br>-No comparison group<br>-Survey sent to participating centers to complete case report form; 15/33 (45%) centers used rituximab and responded to survey | 24 with refractory TTP; 14 first episode 10 relapse.<br>- Excluded secondary TTP (infection, pregnancy, drugs, CTD, malignancy, BMT) | Not based on ADAMTS13 activity; clinical assessment                                   | 375 mg/m <sup>2</sup> weekly x 4 (range 1-8)<br>-Started at median 13 days (range 2-57 days) after diagnosis<br>-Rituximab initiated at discretion of physician if patient deemed refractory (TP <50 after PEX x 7 days or new clinical symptoms) | Daily PEX + prednisolone 1-2 mg/kg/day IV<br>-Previous treatment with vincristine (n=12) and splenectomy (n=3)                                  | -Median 30 months (range 7.5-64 months)                                            | -21/24 (87.4%) patients achieved CR at median 2 weeks (range 1-5)<br>- Median follow-up 30 months (range 7.5-74 months),<br><br>In patients with first episode:<br>- Median 16 PEX prior to rituximab<br>-13/14 (93%) patients achieved CR<br>-1/14 deaths<br>-13 patients in remission; 1 relapse at 29 months post-rituximab<br><br>In patients with a relapsed episode:<br>Median 11 PEX prior to rituximab<br>-8/10(80%) patients achieved CR<br>-2/10 deaths<br>-8 patients in remission and 2 relapsed at 7 and 29 months post rituximab | -Diagnosis not based on ADAMTS13 levels<br>-Measured ADAMTS13 in 3 patients, noted <5% with inhibitors detected prior to rituximab; activity increased and inhibitors decreased post-rituximab (data not supplied)<br>-Mild side effects in 4 (17%) patients with chills, erythema, pruritis |
| Ling, 2009 <sup>8</sup>        | Retrospective, single center, cases between 2001-07<br>-No comparison group                                                                                                                          | 13; 6 first episode TTP,, 7 relapsed episode<br>-5 patients had additional disorders ((SLE, HIV, MCTD, CTD, myositis)                | Based on clinical assessment, not ADAMTS13 activity. 12 patients had ADAMTS13 <10%, 1 | 375 mg/m <sup>2</sup> weekly x 4,<br>-Started after 12-39 PEX<br>-Rituximab initiated at discretion of physician if patient                                                                                                                       | PEX daily 1.5x volume and FFP, 11/13 received steroids (5/6 first episode, 6/7 relapsed), 3/13 (1 first episode, 2 relapsed) received cytotoxic | -Median 24 months (range 13-84 months)<br>-Followed monthly x 6 months then yearly | -12/13 (92%) achieved CR (6/6 first episode; 6/7 relapsed)<br>-No subsequent relapses occurred with median follow-up of 24 months (range, 13-84 months)<br>-12/13 patients with ADAMTS13 activity <10% with detectable inhibitor levels prior                                                                                                                                                                                                                                                                                                  | -ADAMTS drawn prior to PEX and 3-6 months as outpatient<br>- 4 patients had an additional diagnosis of CTD; 1 patient had HIV infection. 4                                                                                                                                                   |

|                            |                                                                                                |                                                                                                                                                |                                                                                                                   |                                                                                                                                                                                                                                          |                                                                                                                                                               |                                                                                                                      |                                                                                                                                                                                                                                                                     |                                                                                                                                                                                                                                                                                                                                                                                                   |
|----------------------------|------------------------------------------------------------------------------------------------|------------------------------------------------------------------------------------------------------------------------------------------------|-------------------------------------------------------------------------------------------------------------------|------------------------------------------------------------------------------------------------------------------------------------------------------------------------------------------------------------------------------------------|---------------------------------------------------------------------------------------------------------------------------------------------------------------|----------------------------------------------------------------------------------------------------------------------|---------------------------------------------------------------------------------------------------------------------------------------------------------------------------------------------------------------------------------------------------------------------|---------------------------------------------------------------------------------------------------------------------------------------------------------------------------------------------------------------------------------------------------------------------------------------------------------------------------------------------------------------------------------------------------|
|                            |                                                                                                |                                                                                                                                                | patient 36%.                                                                                                      | deemed refractory (>1 week PEX)                                                                                                                                                                                                          | agents (vincristine or cyclophosphamide). 1 patient had splenectomy (first episode)                                                                           |                                                                                                                      | to rituximab; post-rituximab 7/8 patients (3/3 first episode; 4/5 relapsed) had increased ADAMTS levels with resolution of inhibitor; 1 relapsed patient with no response and died of bleeding                                                                      | patients had concurrent treatment with cyclophosphamide or splenectomy.                                                                                                                                                                                                                                                                                                                           |
| Jasti, 2008 <sup>9</sup>   | Retrospective, single center, cases between January 2001-February 2007<br>-No comparison group | 12 ; 11 first episode 1 relapsed episode<br>-Excluded TTP due to drugs, transplant, pregnancy, CTD<br>-1 patient with pancreatitis, 1 with HIV | 6/12 patients with ADAMTS13 <5% with inhibitor; no measurements in 6 patients                                     | -375 mg/m <sup>2</sup> every 3-7 days in most patients x 1-13 doses<br>-100 mg/m <sup>2</sup> x12 doses in 1 patient<br>-Started 2-19 days from presentation (text; table 2-16 days)<br>-Dose, timing, frequency at physician discretion | -PEX 1-1.5x plasma volume daily, held day post-rituximab<br>-Median number of PEX 19 (range 13-41)<br>-Steroids in 'most of patients at varying doses'        | Median 57 months (range 1-79 months)<br>-2 patients lost to follow-up; 1 and 8 months                                | -10/12 (83%) responded after rituximab, 2 patients died<br>-Median time to CR 18 days (14-41) among 10 survivors.,<br>-1/10 relapsed twice after rituximab at 24 and 22 months                                                                                      | -1 patient (also reported by Montoya below in prophylaxis section) with herpes zoster transverse myelitis with paraplegia and, encephalitis after 2 <sup>nd</sup> course of rituximab, also on steroids; she slowly regained strength and normal mental status. She received re-treatment with rituximab and PEX on relapse (no steroids, received prophylactic antivirals) with no complications |
| Scully, 2006 <sup>10</sup> | Prospective, multicenter (3 UK tertiary referral centers)<br>-No comparison group              | 25; 14 first episode, 11 relapsed episode (failed to achieve normal platelet count after PEX x 7 days or deterioration of clinical symptoms),  | Included only patients with an inhibitor or IgG antibodies to ADAMTS13 at presentation. 21 patients with ADAMTS13 | 375 mg/m <sup>2</sup> weekly x 4 following PEX<br>-4 patients with ADAMTS13 levels below normal range or                                                                                                                                 | -PEX 1-1.5 x plasma volume daily and methylprednisolone IV daily x 3<br>-PEX daily until platelets >150 x 10 <sup>9</sup> /L for minimum 48 hours, then every | -Median follow up 10 months (range 1-33 months)<br>-Followed monthly x 3 months, then q3 months x 12 months, then q6 | -All patients (25/25) reached CR in median 11 days after rituximab<br>-6 patients with persistently low ADAMTS13 post-rituximab (below normal value of 66%; for 6 median 31%, <5% - 55%)<br>-1 death from pneumonia after remission<br>-No relapses reported within | No increase in infections or side effects from rituximab<br>-1 patient had widespread morbilliform pruritic rash, with eosinophilia, 1 week after 4                                                                                                                                                                                                                                               |

|  |  |                                                                            |                                                                                                                                                               |                                                                                                    |                                                                                                                                  |        |                  |                                                                                                                                                                                                                     |
|--|--|----------------------------------------------------------------------------|---------------------------------------------------------------------------------------------------------------------------------------------------------------|----------------------------------------------------------------------------------------------------|----------------------------------------------------------------------------------------------------------------------------------|--------|------------------|---------------------------------------------------------------------------------------------------------------------------------------------------------------------------------------------------------------------|
|  |  | -Excluded TTP due to HIV, drugs, bone marrow transplant, cancer, pregnancy | activity <5%; 3 with ADAMTS13 activity 11-23%; 1 no baseline ADAMTS13 activity, transferred to participating center after 6 weeks PEX – ADAMTS13 activity 64% | inhibitors received additional rituximab weekly to maximum 8 treatments -1 patient only weekly x 2 | other day<br>-Vincristine 1 mg IV q3-4 days x 4 in 12 patients, defibrotide in 3 patients, cyclosporin (4), cyclophosphamide (1) | months | follow-up period | rituximab treatments; resolved over 4 weeks with steroid creams and antihistamines -After acute treatment, 1 patient also received rituximab prophylaxis (ADAMTS13 <10% occurring 2 years after previous rituximab) |
|--|--|----------------------------------------------------------------------------|---------------------------------------------------------------------------------------------------------------------------------------------------------------|----------------------------------------------------------------------------------------------------|----------------------------------------------------------------------------------------------------------------------------------|--------|------------------|---------------------------------------------------------------------------------------------------------------------------------------------------------------------------------------------------------------------|



**Table 3: Rituximab prophylaxis in asymptomatic patients following recovery from TTP with severe ADAMTS13 deficiency**

| Author, year (ref)      | Study design/ comparison group                                                                                                                                      | Patients                                                                                                                                                                                                                                                                                                                                                                                                                                    | TTP diagnosis/ inclusion-exclusion criteria                                                                                                                                                                                                                             | Rituximab dose, schedule                                                                                                                                                                                                      | Additional treatments                                                                                                                                                                                                                                                                                                                                                                                                                                                                                               | Follow-up                                                                                                                                                                                                 | Outcomes                                                                                                                                                                                                                                                                                                                                                                                                                                                                                                                                                                                                                                                                                                                                                                                                                                                                                                   | Comments                                                                                                                                                                                                                                                                                                                                                                                                                                                                                           |
|-------------------------|---------------------------------------------------------------------------------------------------------------------------------------------------------------------|---------------------------------------------------------------------------------------------------------------------------------------------------------------------------------------------------------------------------------------------------------------------------------------------------------------------------------------------------------------------------------------------------------------------------------------------|-------------------------------------------------------------------------------------------------------------------------------------------------------------------------------------------------------------------------------------------------------------------------|-------------------------------------------------------------------------------------------------------------------------------------------------------------------------------------------------------------------------------|---------------------------------------------------------------------------------------------------------------------------------------------------------------------------------------------------------------------------------------------------------------------------------------------------------------------------------------------------------------------------------------------------------------------------------------------------------------------------------------------------------------------|-----------------------------------------------------------------------------------------------------------------------------------------------------------------------------------------------------------|------------------------------------------------------------------------------------------------------------------------------------------------------------------------------------------------------------------------------------------------------------------------------------------------------------------------------------------------------------------------------------------------------------------------------------------------------------------------------------------------------------------------------------------------------------------------------------------------------------------------------------------------------------------------------------------------------------------------------------------------------------------------------------------------------------------------------------------------------------------------------------------------------------|----------------------------------------------------------------------------------------------------------------------------------------------------------------------------------------------------------------------------------------------------------------------------------------------------------------------------------------------------------------------------------------------------------------------------------------------------------------------------------------------------|
| Hie, 2014 <sup>11</sup> | Cross sectional analysis of 12 year follow-up data (Oct 2000- Jan 2012) from the French TMA Reference Center comparing relapse incidence with and without rituximab | 48; 30 (group 1); received preemptive rituximab and other treatments), 18 (group 2); no treatment, these patients were managed prior to the era of rituximab or centers where prophylactic rituximab was not standard of care); all patients had ≥1 episode of TTP followed by ADAMTS13 <10% during remission. 33% (10/30) in group 1 and 67% (12/18) in group 2 had persistent undetectable ADAMTS13 activity after TTP episode (p=.0248). | Selected surviving patients from French registry who were in durable clinical remission (no thrombocytopenia, renal failure or clinical worsening >30 consecutive days from 1 <sup>st</sup> day of platelet recovery) with ADAMTS13 activity <10% and follow-up ≥1 year | 375 mg/m <sup>2</sup> weekly x 1-4 infusions at discretion of physician, started after detection of ADAMTS13 deficiency (activity and antibodies measured before rituximab, 1 and 3 months after rituximab then q3 x 2 years) | -Acute phase TTP treatment based on protocol implemented in Oct 2000; PEX 1.5x volume daily until remission then maintenance x 3 weeks + steroids 1 mg/kg/d x 3 weeks (if no active infection) + folic acid<br>-10/30 (33%) patients in group 1 and 5/18 (28%) in group 2 received rituximab during acute TTP episode.<br>-Treatment during remission: 9/30 patients received 1-10 additional courses of rituximab; 1 patient received continuing rituximab every 6 months; 4 of these 9 patients + 1 other patient | Median follow-up after initial rituximab infusion, 36 months (IQR 24-65 months) Follow-up after completion of all treatments not reported. Median follow-up of control patients, 60 months (IQR 30-72 mo) | - Decrease in relapse incidence from 0.57 episodes/year (IQR, 0.46-0.7) to 0 episodes/year (IQR, 0-0.81) (P<0.01) after median 17 months (IQR 11-29) post rituximab, compared to 0.5 relapses/year (IQR 0.12-0.5;p<0.01) in group 2<br>- Relapse-free survival longer in group 1 vs group 2 (P=0.049)<br><u>Rituximab treated patients (group 1)</u><br>-16/30 (53%) had >1 episode TTP before rituximab with median 2 (IQR 1-3) episodes within 54 months (IQR 33-63)=0.57 episodes/year (IQR 0.46-0.7)<br>-3/30 (10%) relapsed at 14, 18, 43 months = 0 episodes/year (0-0.81)<br>-9/30 (30%) patients required additional rituximab for levels <10% during follow up; 4 of these patients had received rituximab in acute phase<br>-No durable increase in ADAMTS13 activity in 5 patients who then received additional treatments;<br><u>Control patients (group 2)</u><br>-14/18 (78%) had >1 episode | Control group may not be well matched in terms of time or duration of ADAMTS13 deficiency in remission. Increased relapse-free survival in treated group marginal. Decreased frequency of relapse in treated group may be related to continuing treatment and shorter follow-up.<br><br>Only 16 of the 30 patients who relapsed were used to estimate baseline relapse rate in treated patients which may overestimate actual baseline relapse rate; also relapse rate assumed to be constant over |

|                             |                                                                 |                                                                                                                                                                                                                      |                                       |                                                                                                                                   |                                                                                                                                                                                                                                        |                                                                                                                                                      |                                                                                                                                                                                                                                                                                                                                                                                   |                                                                                                                                                                                                                   |
|-----------------------------|-----------------------------------------------------------------|----------------------------------------------------------------------------------------------------------------------------------------------------------------------------------------------------------------------|---------------------------------------|-----------------------------------------------------------------------------------------------------------------------------------|----------------------------------------------------------------------------------------------------------------------------------------------------------------------------------------------------------------------------------------|------------------------------------------------------------------------------------------------------------------------------------------------------|-----------------------------------------------------------------------------------------------------------------------------------------------------------------------------------------------------------------------------------------------------------------------------------------------------------------------------------------------------------------------------------|-------------------------------------------------------------------------------------------------------------------------------------------------------------------------------------------------------------------|
|                             |                                                                 |                                                                                                                                                                                                                      |                                       |                                                                                                                                   | also received additional treatments: (cyclophosphamide, cyclosporine, mycophenolate, bortezomib, splenectomy)                                                                                                                          |                                                                                                                                                      | TTP with 7 patients (39%) having median 1 (IQR 1-3) episode/year within 5 year follow up (IQR 30-72 months) = 0.5 relapses/year (IQR 0.12-0.5)                                                                                                                                                                                                                                    | time, which is unlikely. Additional treatments given in prophylaxis group during follow-up (benefit of a single course of rituximab unknown)                                                                      |
| Westwood, 2013 <sup>2</sup> | Retrospective cohort, Jan 2004-Dec 2011<br>-No comparison group | 14 patients (19 episodes) who previously had TTP and were in clinical remission with ADAMTS13 levels <14%. Two patients who were treated to allow withdrawal from cyclosporine or tacrolimus were not analyzed here. | Based on ADAMTS13 levels of <5-14%    | -375 mg/m <sup>2</sup> x 4 (maximum 6), given weekly (n=12 patients);<br>-100 mg/m <sup>2</sup> x 4 (n=3 patients) more recently  | -12/14 patients received additional treatment (excluding PEX, steroids)<br>-8/14 patients received rituximab previously<br>-3 vincristine, 4 defibrotide, 6 cyclosporine                                                               | -Follow-up median 23 months (1-89 months)<br>-Followed weekly x 4 weeks post discharge then monthly x 3 months, then q3-6 months (median, 15 months) | -18/19 episodes treated with rituximab resulted in normalization of ADAMTS13 levels within 3 months<br>-4 patients (5 episodes) given additional rituximab (375 mg/m <sup>2</sup> in 4; 100 mg/m <sup>2</sup> in 1 weekly x 4) for subsequent drop in ADAMTS13 levels, median time to decrease in ADAMTS13 levels of 13 months (10-26 months)<br>-1 patient relapsed at 70 months | Interpretation uncertain because of no comparison group. ADAMTS13 levels <5% or <15% (deemed at high risk for relapsed based on previous presentation) in remission                                               |
| Montoya, 2012 <sup>12</sup> | Case report<br>-No comparison group                             | 1 patient with 5 previous relapses                                                                                                                                                                                   | No ADAMTS13 measurement for diagnosis | 375 mg/m <sup>2</sup> weekly x 4 started when ADAMTS13 level 11% and inhibitor 1.8 IU, patient asymptomatic in clinical remission | -1 <sup>st</sup> relapse treated with PEX, steroids<br>-Received rituximab during treatment of 2 <sup>nd</sup> relapse due to non-response to PEX and steroids, 3 <sup>rd</sup> , 4 <sup>th</sup> and 5 <sup>th</sup> relapses treated | See Outcomes                                                                                                                                         | - ADAMTS13 level increased to 59% 1 week post 1 <sup>st</sup> treatment and increased >95% 4 weeks after 4 <sup>th</sup> infusion<br>- Follow-up 6 months<br>- Patient previously treated with rituximab for four relapses, and then treated in remission with a low ADAMTS13 activity following her fifth relapse. Duration of remission after 4 <sup>th</sup> relapse, 22       | This patient (also reported by Jasti above) had herpes zoster transverse myelitis with paraplegia and, encephalitis after 2 <sup>nd</sup> course of rituximab, also on steroids; she slowly regained strength and |

|                             |                                                                                                           |                                                                                                              |                                                                                                                |                                                                                                                                                                     |                                                                                                                                                                                                                                                              |                                                                                                |                                                                                                                                                                                                                                                                                                                                                                                                                             |                                                                                                                                                                              |
|-----------------------------|-----------------------------------------------------------------------------------------------------------|--------------------------------------------------------------------------------------------------------------|----------------------------------------------------------------------------------------------------------------|---------------------------------------------------------------------------------------------------------------------------------------------------------------------|--------------------------------------------------------------------------------------------------------------------------------------------------------------------------------------------------------------------------------------------------------------|------------------------------------------------------------------------------------------------|-----------------------------------------------------------------------------------------------------------------------------------------------------------------------------------------------------------------------------------------------------------------------------------------------------------------------------------------------------------------------------------------------------------------------------|------------------------------------------------------------------------------------------------------------------------------------------------------------------------------|
|                             |                                                                                                           |                                                                                                              |                                                                                                                |                                                                                                                                                                     | with PEX ± steroids and rituximab<br>-Received rituximab weekly x 8 following relapse 3, 4 and 5                                                                                                                                                             |                                                                                                | months; duration of follow-up after 5 <sup>th</sup> relapse 18 months until ADAMTS13 11% with no clinical evidence of TTP.<br>-Rituximab given with subsequent follow-up of 14 months.                                                                                                                                                                                                                                      | normal mental status. She received re-treatment with rituximab and PEX on relapse (no steroids, received prophylactic antivirals) with no complications                      |
| Jayabose 2011 <sup>13</sup> | Case report<br>-No comparison group                                                                       | 1, 2 relapses after first TTP, each in approximately 1 year                                                  | ADAMTS13 <5%                                                                                                   | 375 mg/m <sup>2</sup> weekly x 4 started when ADAMTS13 levels <4% and inhibitor detected                                                                            | -After 2 <sup>nd</sup> relapse and clinical remission, treated with vincristine, prednisone and one dose of rituximab with increase in ADAMTS13 99% but decreased <5% with detectable inhibitor, while in clinical remission one year later. Given rituximab | 124 weeks (~2.4 years) from 2 <sup>nd</sup> relapse; 60 weeks following prophylactic rituximab | -ADAMTS13 levels >100% at 9 weeks, and 108% at 60 weeks<br>-Patient in remission for 60 months at time of publication                                                                                                                                                                                                                                                                                                       | -Patient initially presented at age 10<br>-ADAMTS13 levels <5% for 20-47 weeks prior to 2 clinical relapses                                                                  |
| Bresin, 2009 <sup>14</sup>  | Retrospective registry data from 154 centers in Italy and 11 additional countries<br>-No comparison group | 5, 4 with relapsed TTP, 1 following first episode (Patient #1 previously reported by Galbusera and Fakhouri) | ADAMTS13 <6% for inclusion during a clinical remission<br>-ADAMTS13 activity and inhibitors measured q3 months | 375 mg/m <sup>2</sup> weekly x 4, timing of start variable but all patients in clinical remission<br>-Two patients treated with 2 courses while in remission then 1 | -All patients previously treated with PEX or plasma infusions, steroids; 4 received IVIG, 3 ASA, 3 vincristine/vinblastine, 2 cyclosporine, 2 cyclophosphamide, 1 defibrotide, 1 azathioprine, 1 splenectomy,<br>-2 patients received rituximab              | Follow-up of 4 patients 6-32 months (median, 28 months)                                        | - Disappearance of inhibitors after 3 months in all patients<br>- ADAMTS13 activity >20% without inhibitors at 6 months in all patients<br>- Disease-free in 4 patients after, 29, 24 and 6 months<br>- Relapses in 2 patients during follow-up; 1 patient treated with rituximab 19 months apart and relapsed at 51 months; second patient treated with rituximab, vincristine, vinblastine at relapse and given rituximab | - Adults with at least 1 episode TTP in current clinical remission >30 days from last PEX with <6% ADAMTS13 activity<br>-ADAMTS13 activity 15- 75% at 3months post rituximab |

|                                |                                     |                                                                  |                                                    |                                                                                             |                                                                                                                                                                                                                                                                                                                                        |                                         |                                                                                                                                                                                                                                                                                      |                                                                        |
|--------------------------------|-------------------------------------|------------------------------------------------------------------|----------------------------------------------------|---------------------------------------------------------------------------------------------|----------------------------------------------------------------------------------------------------------------------------------------------------------------------------------------------------------------------------------------------------------------------------------------------------------------------------------------|-----------------------------------------|--------------------------------------------------------------------------------------------------------------------------------------------------------------------------------------------------------------------------------------------------------------------------------------|------------------------------------------------------------------------|
|                                |                                     |                                                                  |                                                    | treated with continuous rituximab every 3 months                                            |                                                                                                                                                                                                                                                                                                                                        |                                         | prophylaxis after ADAMTS13 activity low ~17 months after initial rituximab dose another pre-emptive course of rituximab 13 months later with relapse 11 months later, for one year one dose of rituximab every 3 months<br>-Both relapsed patients treated with additional rituximab |                                                                        |
| Schleinitz, 2007 <sup>15</sup> | Case report<br>-No comparison group | 1, patient with 2 relapses; first TTP developed during pregnancy | ADAMTS13 activity undetectable, inhibitor detected | 375 mg/m <sup>2</sup> weekly x 4                                                            | -first episode treated with PEX with clinical remission<br>-Relapsed after delivery, treated with PEX x 7 with clinical remission. Second relapse 22 mo later treated with PEX x 31, vincristine, steroids with increase in ADAMTS13 activity to 58% and disappearance of inhibitor; ADAMTS13 activity decreased to 5% 15 months later | - 9 months after prophylactic rituximab | -15 months follow-up from last relapse found ADAMTS13 activity 5% with recurrence of inhibitor<br>-Post-rituximab ADAMTS13 activity levels increased to normal and inhibitor eradicated<br>-9 months post treatment ADAMTS13 activity 128%                                           | -Follow-up duration may be insufficient to determine risk for relapse. |
| Benetatos, 2006 <sup>16</sup>  | Case report - No comparison group   | 1, patient with 6 relapses                                       | No measurement of ADAMTS13 activity                | 375 mg/m <sup>2</sup> weekly x 8 started 1 month after last PEX while in clinical remission | -Previous treatments with PEX, FFP infusion, steroids, Ig, antiplatelet agents                                                                                                                                                                                                                                                         | -23 months post rituximab               | -No relapse reported at 23 months post-rituximab therapy                                                                                                                                                                                                                             | - No measurement of ADAMTS13 activity or antibodies                    |

|                              |                                                                                        |                                                                                                                                                                                                                       |                                            |                                                                                                |                                                                                                                                                                                                  |                                                                                          |                                                                                                                                                                                                                                                                                                                                                                                                                                                                                                                                                                                                                     |                                                                                                                                                                                                                                                                                                                                                                                       |
|------------------------------|----------------------------------------------------------------------------------------|-----------------------------------------------------------------------------------------------------------------------------------------------------------------------------------------------------------------------|--------------------------------------------|------------------------------------------------------------------------------------------------|--------------------------------------------------------------------------------------------------------------------------------------------------------------------------------------------------|------------------------------------------------------------------------------------------|---------------------------------------------------------------------------------------------------------------------------------------------------------------------------------------------------------------------------------------------------------------------------------------------------------------------------------------------------------------------------------------------------------------------------------------------------------------------------------------------------------------------------------------------------------------------------------------------------------------------|---------------------------------------------------------------------------------------------------------------------------------------------------------------------------------------------------------------------------------------------------------------------------------------------------------------------------------------------------------------------------------------|
| Fakhouri, 2005 <sup>17</sup> | Prospective, open label, multicenter between Feb 2004-Jan 2005<br>-No comparison group | 5 with ≥2 previous TTP episodes, failed ≥1 treatment other than plasma (vincristine, IVIG, splenectomy) in current remission<br>-Excluded patients with immune deficiencies, active viral infections (hepatitis, HIV) | ADAMTS13 <5% with a demonstrable inhibitor | 375 mg/m <sup>2</sup> weekly x 4<br>- Patients in remission for 1-19 months at study inclusion | -Previous treatments with PEX, vincristine (n=4), splenectomy (4), IVIG (2), cyclosporine (1), rituximab (2)<br>-Patients treated with rituximab received it 17 and 20 months prior to inclusion | Followed q3 months clinically and ADAMTS and inhibitor measurement<br>-Range 6-11 months | - No clinical relapse occurred with 6-11 months follow-up<br>-2 patients recovered ADAMTS13 activity (21% and 45%) with disappearance of inhibitor; 11 months later inhibitor detectable and ADAMTS13 levels decreased; rituximab restarted in 1 patient with no clinical relapse in both<br>- Anti-ADAMTS13 antibodies disappeared, plasma ADAMTS13 activity 29%-75% noted 7-24 weeks after last rituximab infusion<br>-1 patient with ADAMTS13 activity <5% noted at 3 month follow-up with detectable inhibitor, increased activity to 75% with negative inhibitor at 6 months and not seen at 9 month follow-up | Follow-up duration may be insufficient to determine risk for relapse.<br>-Included age >18 years with ≥2 previous TTP episodes, ≥1 extra-hematologic symptoms during previous relapses, failure to ≥1 treatment in addition to PEX, current remission, ADAMTS13 <5% due to inhibitor<br>-B-cell depletion in all patients with recovery by 9 months (but missing data for 3 patients) |
|------------------------------|----------------------------------------------------------------------------------------|-----------------------------------------------------------------------------------------------------------------------------------------------------------------------------------------------------------------------|--------------------------------------------|------------------------------------------------------------------------------------------------|--------------------------------------------------------------------------------------------------------------------------------------------------------------------------------------------------|------------------------------------------------------------------------------------------|---------------------------------------------------------------------------------------------------------------------------------------------------------------------------------------------------------------------------------------------------------------------------------------------------------------------------------------------------------------------------------------------------------------------------------------------------------------------------------------------------------------------------------------------------------------------------------------------------------------------|---------------------------------------------------------------------------------------------------------------------------------------------------------------------------------------------------------------------------------------------------------------------------------------------------------------------------------------------------------------------------------------|

Legend: CTD, connective tissue disease; HIV, human immunodeficiency virus; HUS, hemolytic uremic syndrome; IVIG, intravenous immune globulin; IQR, interquartile range; LDH, lactate dehydrogenase; MAHA, microangiopathic hemolytic anemia; MCTD, mixed connective tissue disease; PEX, plasma exchange; SLE, systemic lupus erythematosus; TTP, thrombotic thrombocytopenic purpura; ULN, upper limit of normal

## Reference List

1. Scully M, McDonald V, Cavenagh J, et al. A phase 2 study of the safety and efficacy of rituximab with plasma exchange in acute acquired thrombotic thrombocytopenic purpura. *Blood*. 2011;118(7):1746-1753.
2. Westwood JP, Webster H, McGuckin S, McDonald V, Machin SJ, Scully M. Rituximab for thrombotic thrombocytopenic purpura: benefit of early administration during acute episodes and use of prophylaxis to prevent relapse. *Journal of Thrombosis & Haemostasis*. 2013;11(3):481-490.
3. Pequeno-Luevano M, Villarreal-Martinez L, Jaime-Perez JC, et al. Low-dose rituximab for the treatment of acute thrombotic thrombocytopenic purpura: report of four cases. *Hematology*. 2013;18(4):233-236.
4. Froissart A, Buffet M, Veyradier A, et al. Efficacy and safety of first-line rituximab in severe, acquired thrombotic thrombocytopenic purpura with a suboptimal response to plasma exchange. Experience of the French Thrombotic Microangiopathies Reference Center. *Critical Care Medicine*. 2012;40(1):104-111.
5. Goyal J, Adamski J, Lima JLO, Marques MB. Relapses of Thrombotic Thrombocytopenic Purpura after Treatment with Rituximab. *Journal of Clinical Apheresis*. 2013;28(6):390-394.
6. Chemnitz JM, Uener J, Hallek M, Scheid C. Long-term follow-up of idiopathic thrombotic thrombocytopenic purpura treated with rituximab. *Annals of Hematology*. 2010;89(10):1029-1033.
7. de la Rubia J, Moscardo F, Gomez MJ, et al. Efficacy and safety of rituximab in adult patients with idiopathic relapsing or refractory thrombotic thrombocytopenic purpura: results of a Spanish multicenter study. *Transfusion & Apheresis Science*. 2010;43(3):299-303.
8. Ling HT, Field JJ, Blinder MA. Sustained response with rituximab in patients with thrombotic thrombocytopenic purpura: a report of 13 cases and review of the literature. *American Journal of Hematology*. 2009;84(7):418-421.
9. Jasti S, Coyle T, Gentile T, Rosales LP, Poiesz B. Rituximab as an adjunct to plasma exchange in TTP: a report of 12 cases and review of the literature. *Journal of Clinical Apheresis*. 2008;23(5):6.
10. Scully MF, Cohen H, Cavenagh JD, et al. Remission in acute refractory and relapsing thrombotic thrombocytopenic purpura following rituximab is associated with a reduction in IgG antibodies to ADAMTS13. *British Journal of Haematology*. 2006;136(3):451-461.
11. Hie M, Gay J, Galicier L, et al. Preemptive rituximab infusions after remission efficiently prevent relapses in acquired thrombotic thrombocytopenic purpura. *Blood*. 2014;124(2):204-210.
12. Montoya RC, Poiesz BJ. Rituximab as prophylaxis in chronic relapsing thrombotic thrombocytopenic purpura: a case report and review of the literature. *Blood Coagulation & Fibrinolysis*. 2012;23(4):338-341.
13. Jayabose S, Dunbar J, Nowicki TS, Tugal O, Ozkaynak MF, Sandoval C. Rituximab therapy to prevent relapse in chronic relapsing thrombotic thrombocytopenic purpura (TTP) in a child. *Pediatric Hematology & Oncology*. 2011;28(2):167-172.
14. Bresin E, Gastoldi S, Daina E, et al. Rituximab as pre-emptive treatment in patients with thrombotic thrombocytopenic purpura and evidence of anti-ADAMTS13 autoantibodies. *Thrombosis & Haemostasis*. 2009;101(2):233-238.
15. Schleinitz N, Ebbo M, Mazodier K, et al. Rituximab as preventive therapy of a clinical relapse in TTP with ADAMTS13 inhibitor. *American Journal of Hematology*. 2007;82(5):417-418.
16. Benetatos L, Vassou A, Bourantas KL. Effectiveness of rituximab as prophylaxis in thrombotic thrombocytopenic purpura. *Clinical & Laboratory Haematology*. 2006;28(4):288-289.
17. Fakhouri F, Vernant JP, Veyradier A, et al. Efficiency of curative and prophylactic treatment with rituximab in ADAMTS13-deficient thrombotic thrombocytopenic purpura: a study of 11 cases. *Blood*. 2005;106(6):1932-1937.
